# Supplementary material for: 2-O-digalloyl-1,3,4,6-tetra-O-galloyl-β-D-glucose isolated from Galla Rhois suppresses osteoclast differentiation and function by inhibiting NF-κB signaling
Source: PubMed Central journal article supplement — BMB Rep. 2019 Jun 30;52(6):409–14. doi: 10.5483/BMBRep.2019.52.6.063 (PMC6605525; doi:10.5483/bmbrep.2019.52.6.063), 2019-06-30

**Manuscript Type:** Article

**2-O-digalloyl-1,3,4,6-tetra-O-galloyl-β-D-glucose isolated from *Galla Rhois* suppresses osteoclast differentiation and function by inhibiting NF-κB signaling**

Hye Jung Ihn<sup>a,1</sup>, Tae Hoon Kim<sup>b,1</sup>, Kiryeong Kim<sup>c</sup>, Gi-Young Kim<sup>d</sup>, You-Jin Jeon<sup>d</sup>, Yung Hyun Choi<sup>e</sup>, Jong-Sup Bae<sup>f</sup>, Jung-Eun Kim<sup>g</sup>, Eui Kyun Park<sup>c,\*</sup>

<sup>a</sup>Institute for Hard Tissue and Bio-tooth Regeneration (IHBR), Kyungpook National University, Daegu 41940, Republic of Korea

<sup>b</sup>Department of Food Science and Biotechnology, Daegu University, Gyeongsan 38453, Republic of Korea

<sup>c</sup>Department of Oral Pathology and Regenerative Medicine, School of Dentistry, IHBR, Kyungpook National University, Daegu 41940, Republic of Korea

<sup>d</sup>Department of Marine Life Sciences, School of Marine Biomedical Sciences, Jeju National University, Jeju 63243, Republic of Korea

<sup>e</sup>Department of Biochemistry, College of Korean Medicine, Dong-Eui University, Busan 47227, Republic of Korea

<sup>f</sup>College of Pharmacy, CMRI, Research Institute of Pharmaceutical Sciences, Kyungpook National University, Daegu, 41566, Republic of Korea

<sup>g</sup>Department of Molecular Medicine, School of Medicine, Kyungpook National University, Daegu, 41944, Republic of Korea

**Running title:** DTOGG suppresses osteoclastogenesis and function

**Keywords:** hydrolysable tannins, 2-O-digalloyl-1,3,4,6-tetra-O-galloyl-β-D-glucose, osteoclast differentiation, bone resorption

**\*Corresponding author:**

Eui Kyun Park, PhD. Tel: +82-53-420-4995, e-mail: [epark@knu.ac.kr](mailto:epark@knu.ac.kr).

<sup>1</sup> **These authors contributed equally to this work.**

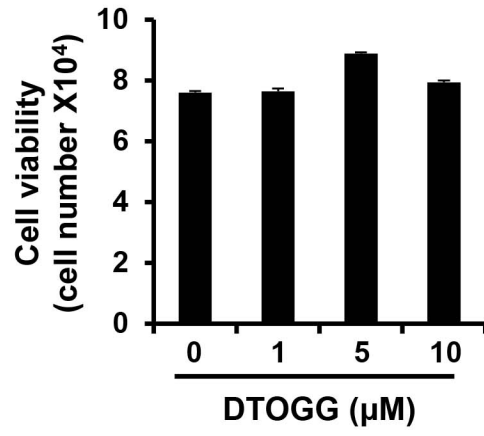

Supplement: BMB-52-409_Supple.pdf [file BMB-52-409_Supple.pdf]
